# Supplementary material
Source: PubMed Central journal article supplement (PMC7440858)
Supplement: mmc1.pdf [file mmc1.pdf]

# THE LANCET

## Global Health

### Supplementary appendix

This appendix formed part of the original submission and has been peer reviewed.  
We post it as supplied by the authors.

Supplement to: Jay J H Park, Eric H Decloedt, Rayner CR, Cotton M, Mills EJ.  
Clinical trials of disease stages in COVID 19: complicated and often misinterpreted.  
*Lancet Glob Health* 2020; published online Aug 20. [http://dx.doi.org/10.1016/S2214-109X\(20\)30365-X](http://dx.doi.org/10.1016/S2214-109X(20)30365-X).

**Figure 1. Disease states for clinical trials of COVID-19**

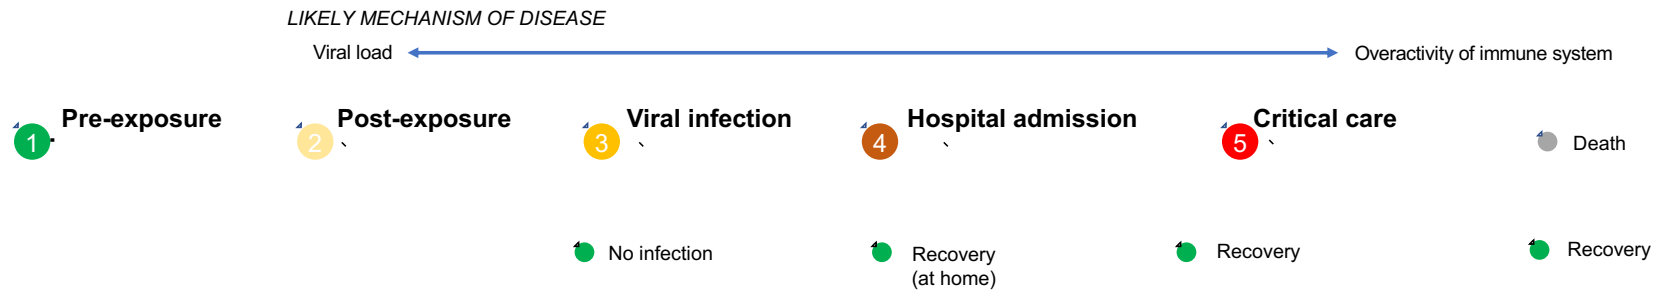

This figure illustrates simple disease states for clinical trials of COVID-19 disease - from pre-exposure to SARS-CoV-2, post-exposure, early infection in outpatient setting, hospitalisation and to advanced disease manifestation that requires intensive care. This figure highlights five different stages of the clinical progression where different treatment strategies could be used to prevent further progression of COVID-19 disease. There are more disease states according to subgroups.
